# Supplementary material
Source: publisher site journal article supplement (https://www.dovepress.com/get_supplementary_file.php?f=477674.docx)
Supplement: Supplementary file 1 [file get_supplementary_file.php]

**Supplemental Figure Legends**

## Supplemental Figure 1 Example inpatient S.C.O.P.E. scenario: individual with no existing diagnosis of schizophrenia presenting with first episode.

**
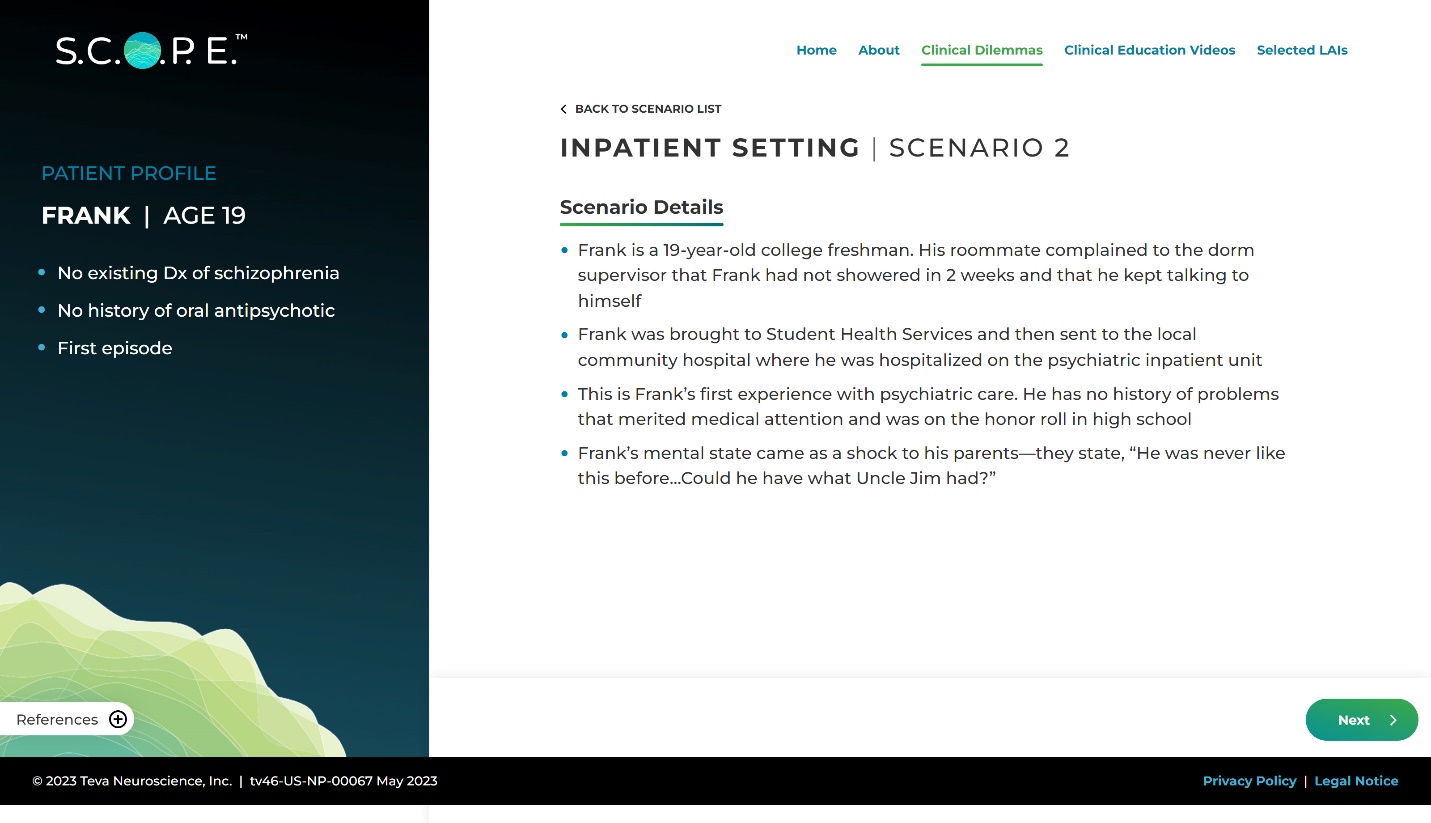
**

**
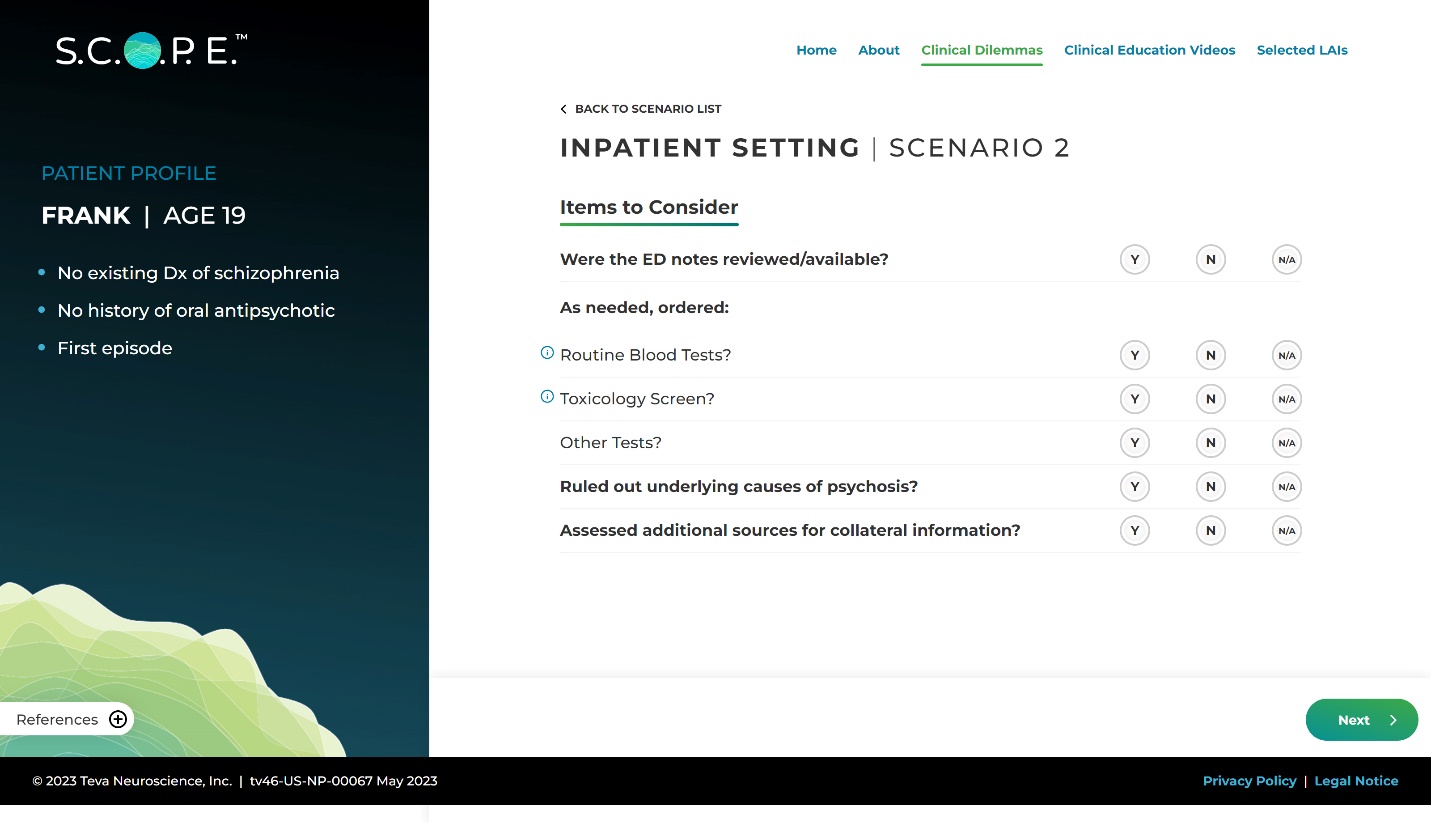
**

**
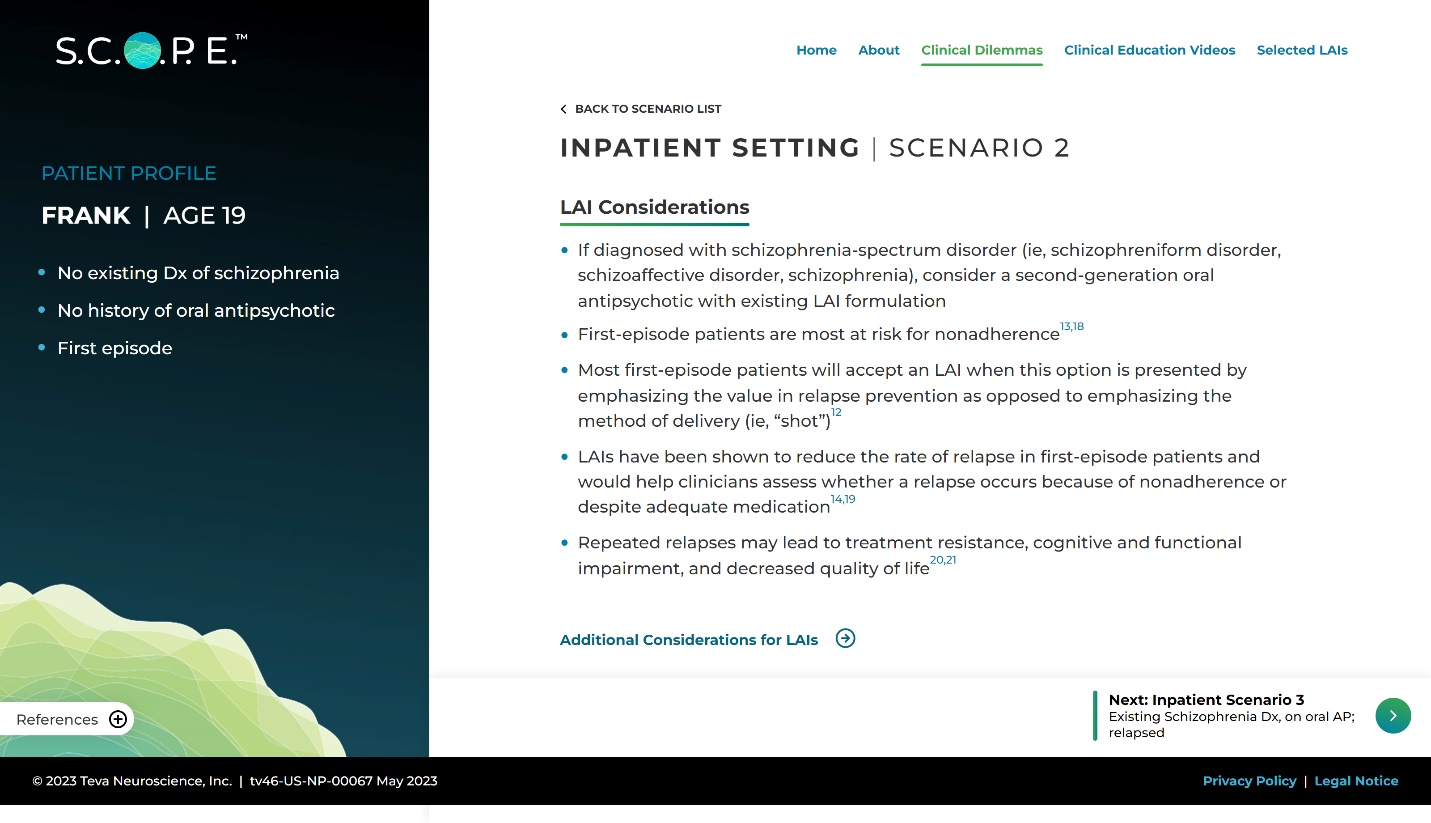
**

**Abbreviations:** Dx, diagnosis; ED, emergency department; LAI, long-acting injectable antipsychotic; S.C.O.P.E, Schizophrenia Clinical Outcome Scenarios and Patient–Provider Engagement.

## Supplemental Figure 2 Example outpatient S.C.O.P.E. scenario: existing schizophrenia diagnosis and substance use.

**
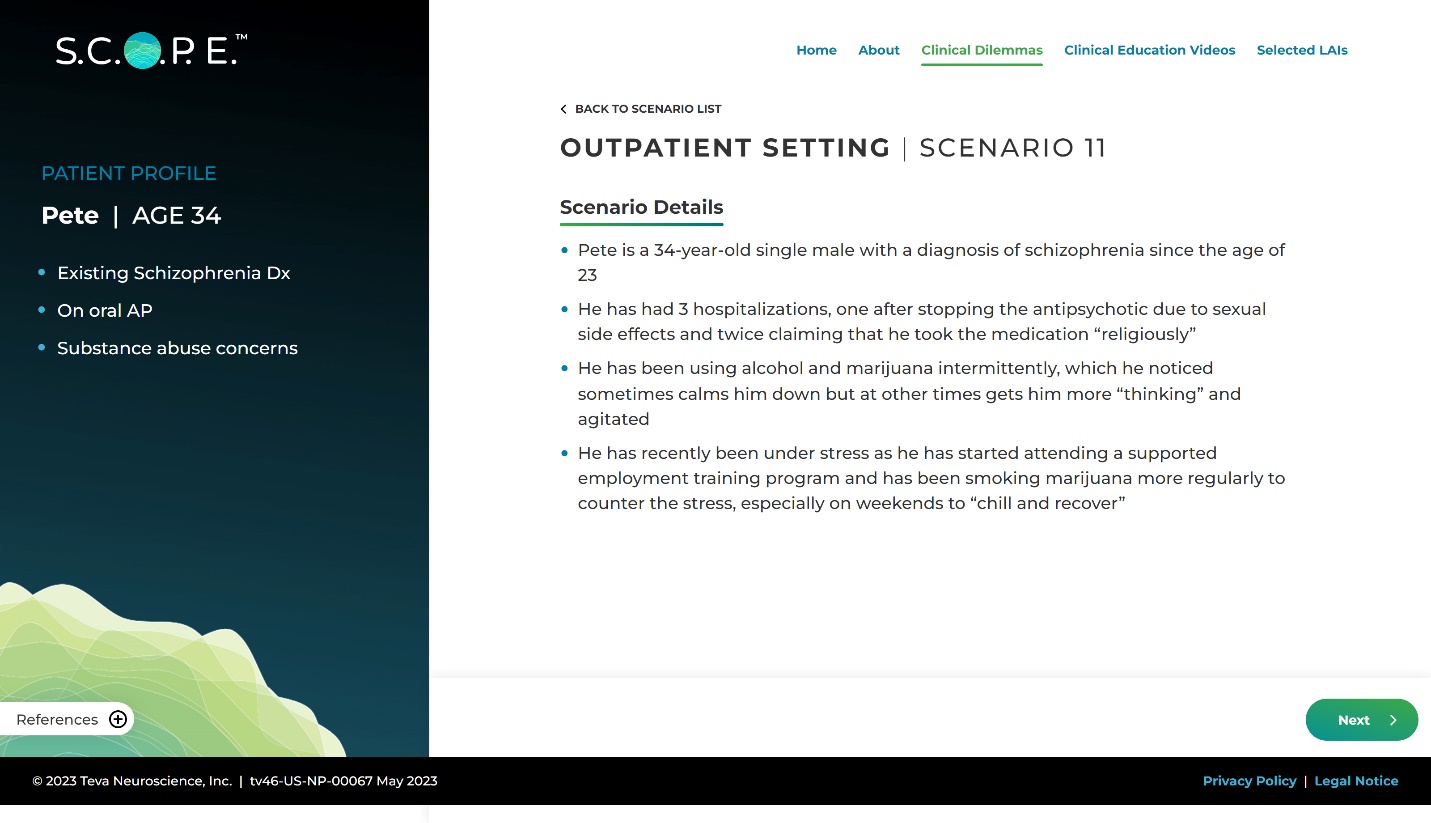
**

**
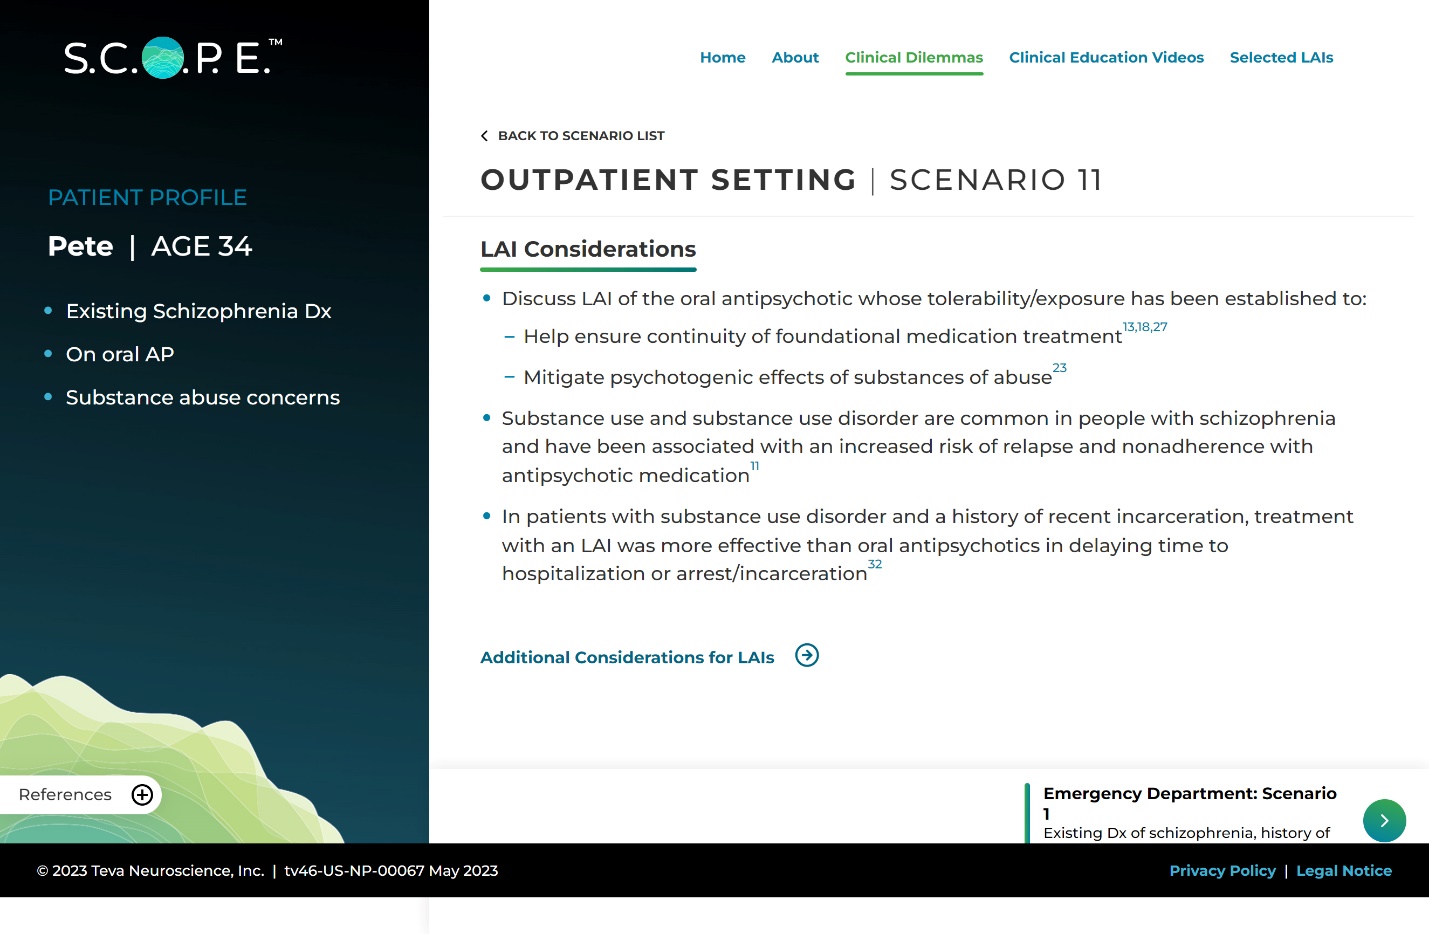
**

**Abbreviations:** AP, antipsychotic; Dx, diagnosis; ED, emergency department; LAI, long-acting injectable antipsychotic; S.C.O.P.E, Schizophrenia Clinical Outcome Scenarios and Patient–Provider Engagement.

## Supplemental Figure 3 Example S.C.O.P.E. clinical education video - acute episode following treatment discontinuation, (A) parent and (B) social worker.

1. Parent


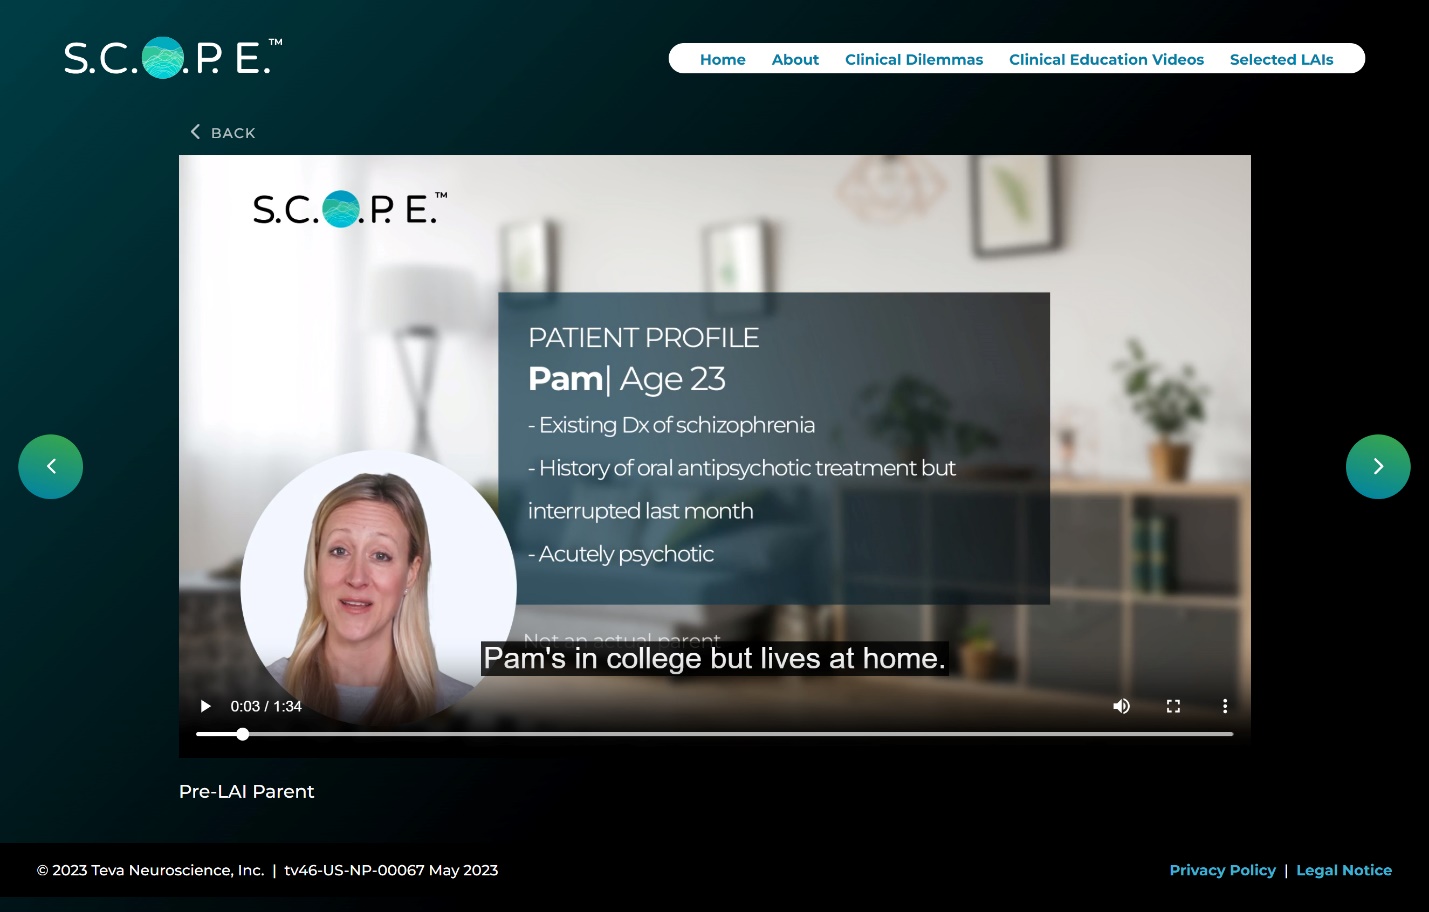


1. Social worker


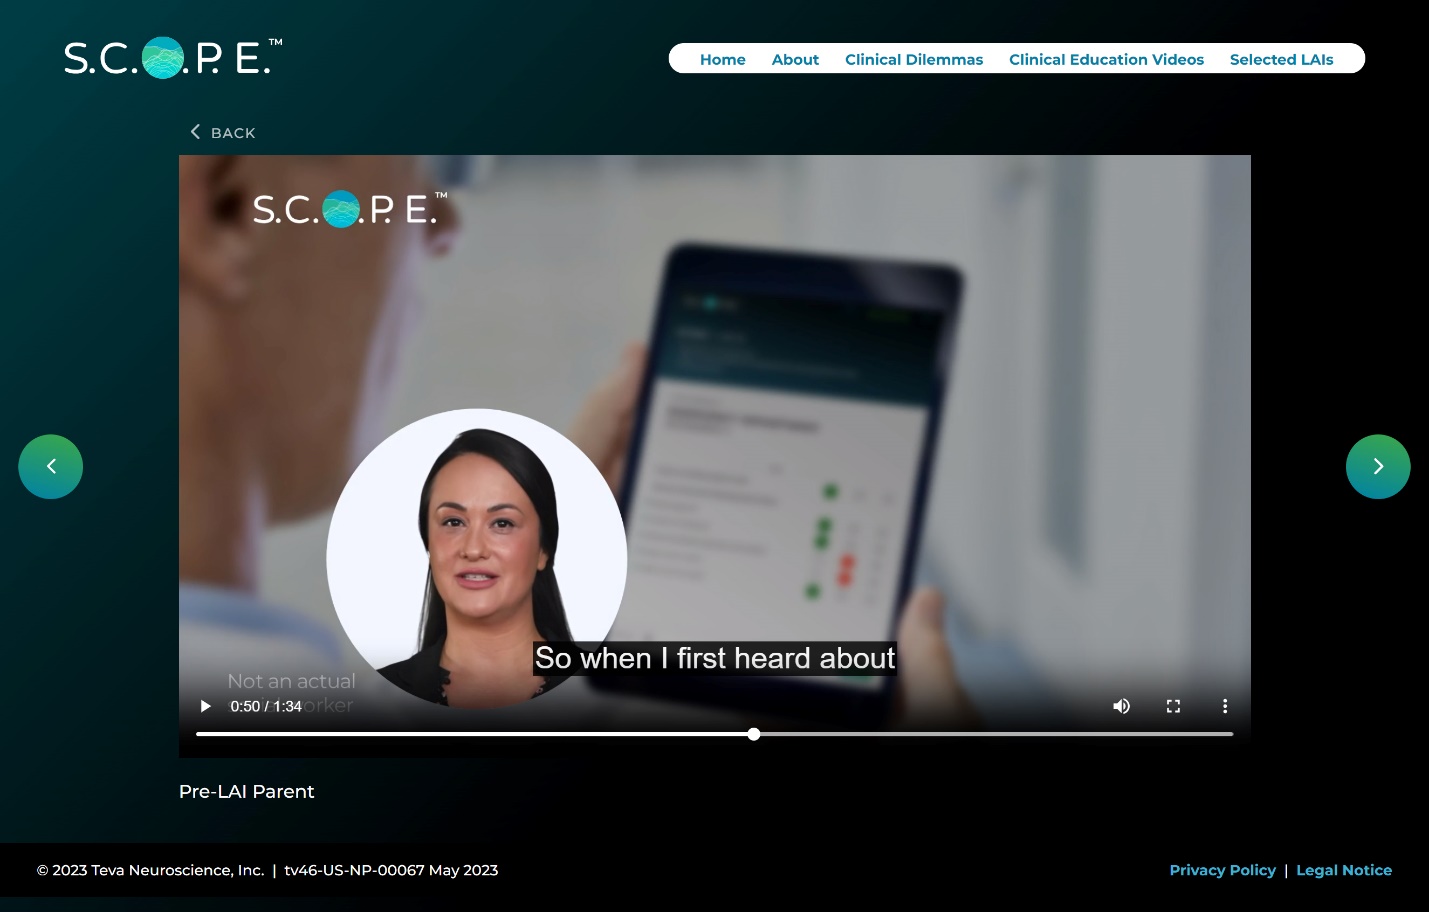


**Abbreviations:** Dx, diagnosis; LAI, long-acting injectable antipsychotic; S.C.O.P.E, Schizophrenia Clinical Outcome Scenarios and Patient–Provider Engagement.

## Supplemental Figure 4 Example S.C.O.P.E. clinical education video – history of nonadherence, (A) patient and (B) case manager.

1. Patient


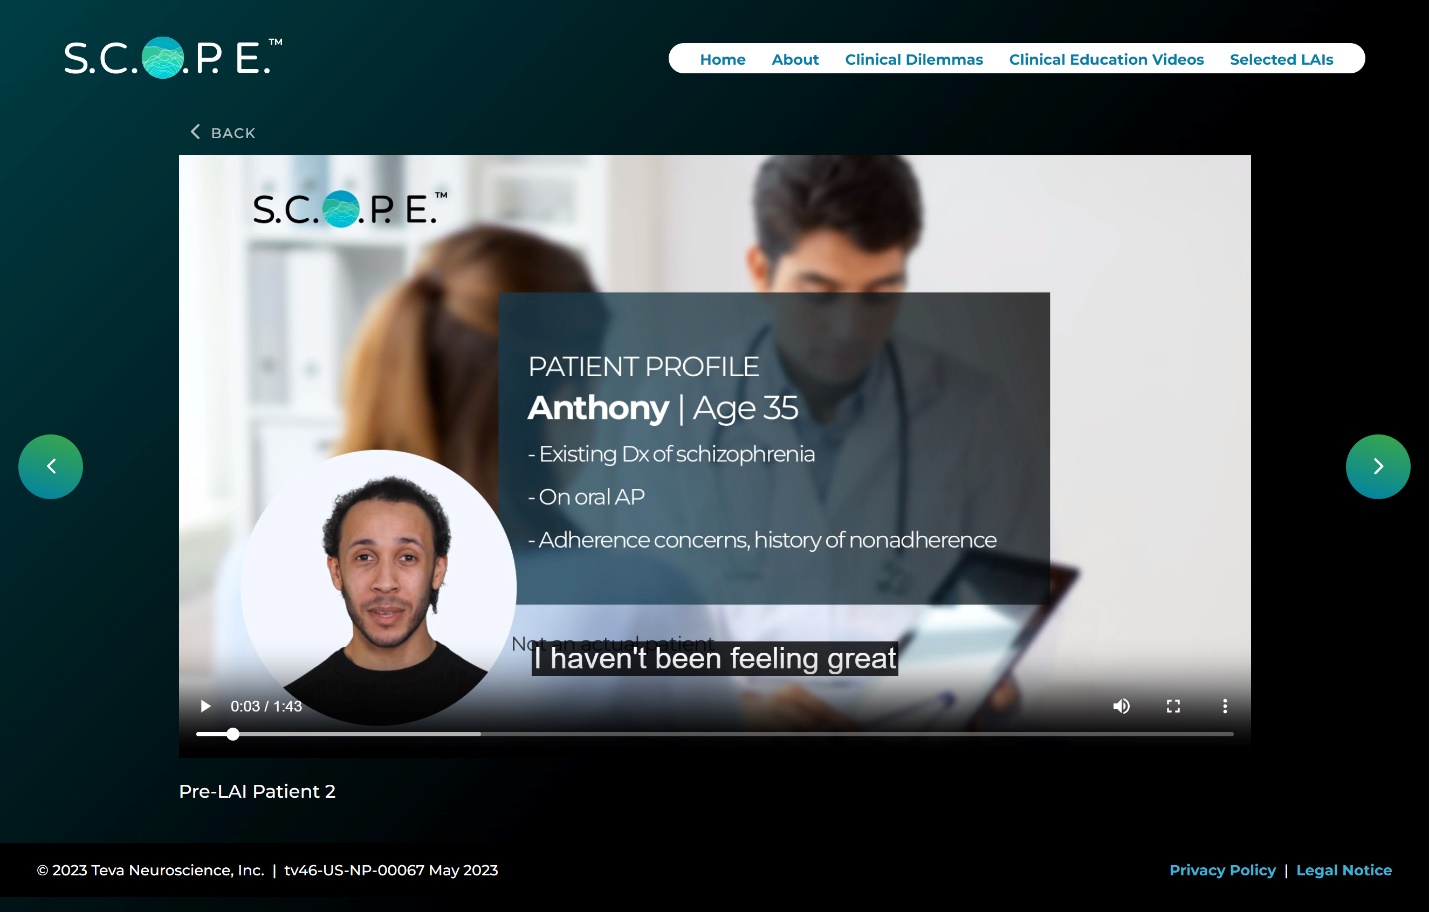


1. Case manager


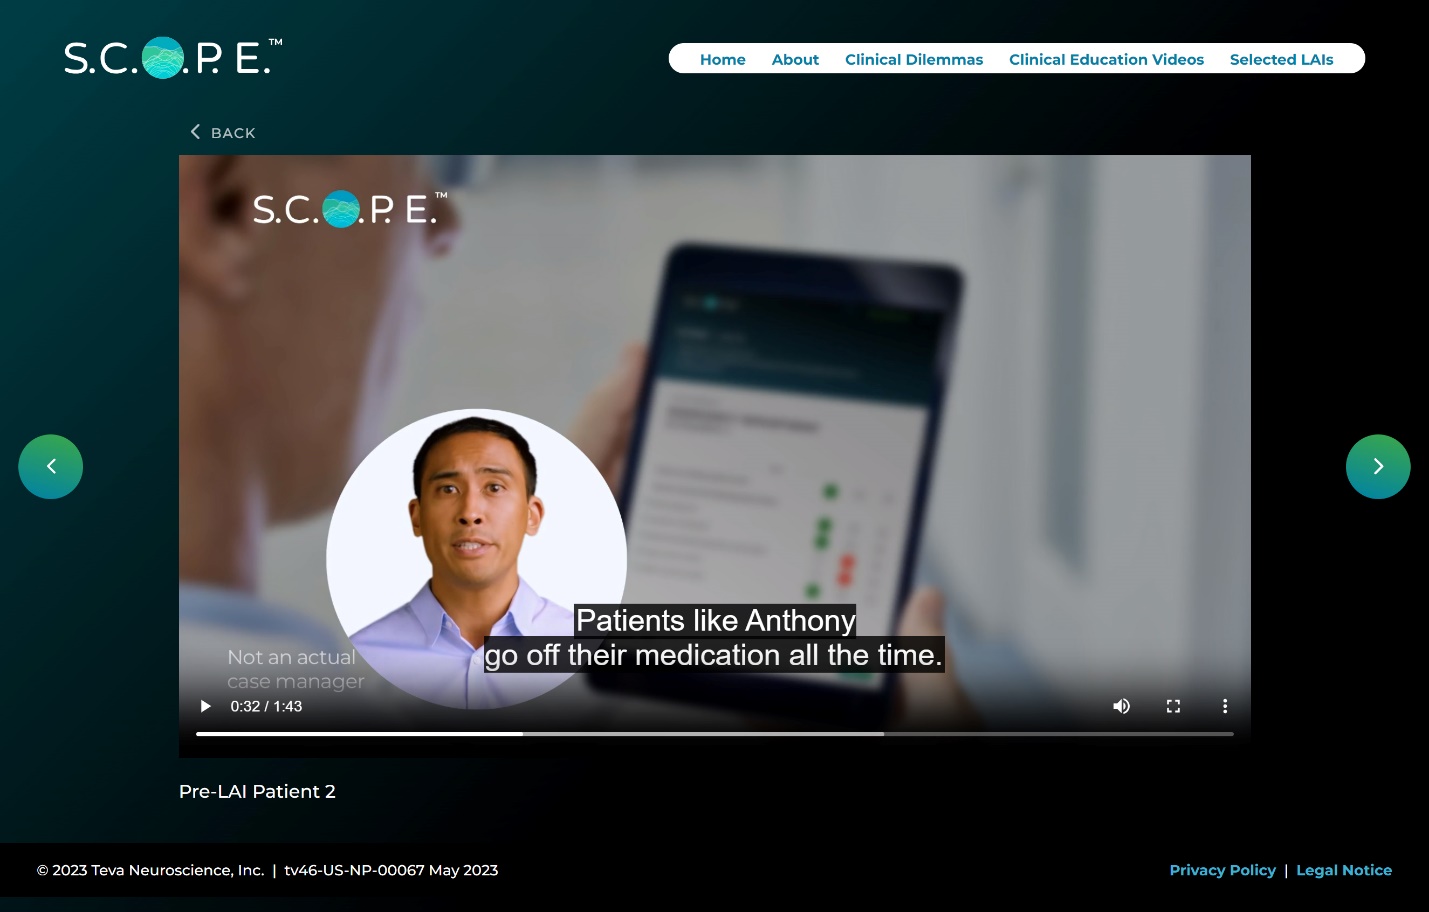


**Abbreviations:** AP, antipsychotic; Dx, diagnosis; LAI, long-acting injectable antipsychotic; S.C.O.P.E, Schizophrenia Clinical Outcome Scenarios and Patient–Provider Engagement.
